# Supplementary material for: Hippocampal inputs engage CCK+ interneurons to mediate endocannabinoid-modulated feed-forward inhibition in the prefrontal cortex
Source: eLife journal article supplement (doi:10.7554/elife.55267), 2020-10-09
Supplement: supp [file elife-55267-supp-v1.zip]

Archive with 7 entries (7 files):
- elife_poa_e55267_Figure_1_figure_supplement_1.pdf
- elife_poa_e55267_Figure_4_figure_supplement_1.pdf
- elife_poa_e55267_Figure_5_figure_supplement_1.pdf
- elife_poa_e55267_Figure_5_figure_supplement_2.pdf
- elife_poa_e55267_Figure_5_figure_supplement_3.pdf
- elife_poa_e55267_Figure_6_figure_supplement_1.pdf
- elife_poa_e55267_Transparent_Reporting_File.docx
