# Supplementary figures and images for: Hippocampal inputs engage CCK+ interneurons to mediate endocannabinoid-modulated feed-forward inhibition in the prefrontal cortex
Source: eLife journal article supplement (doi:10.7554/elife.55267), 2020-10-09

**A**

CCK-Cre x AAV-Dlx-Flex-GFP

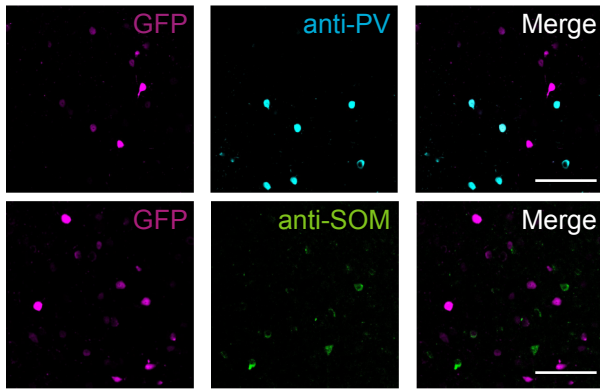

Supplement: supp [file elife-55267-supp-v1.zip]

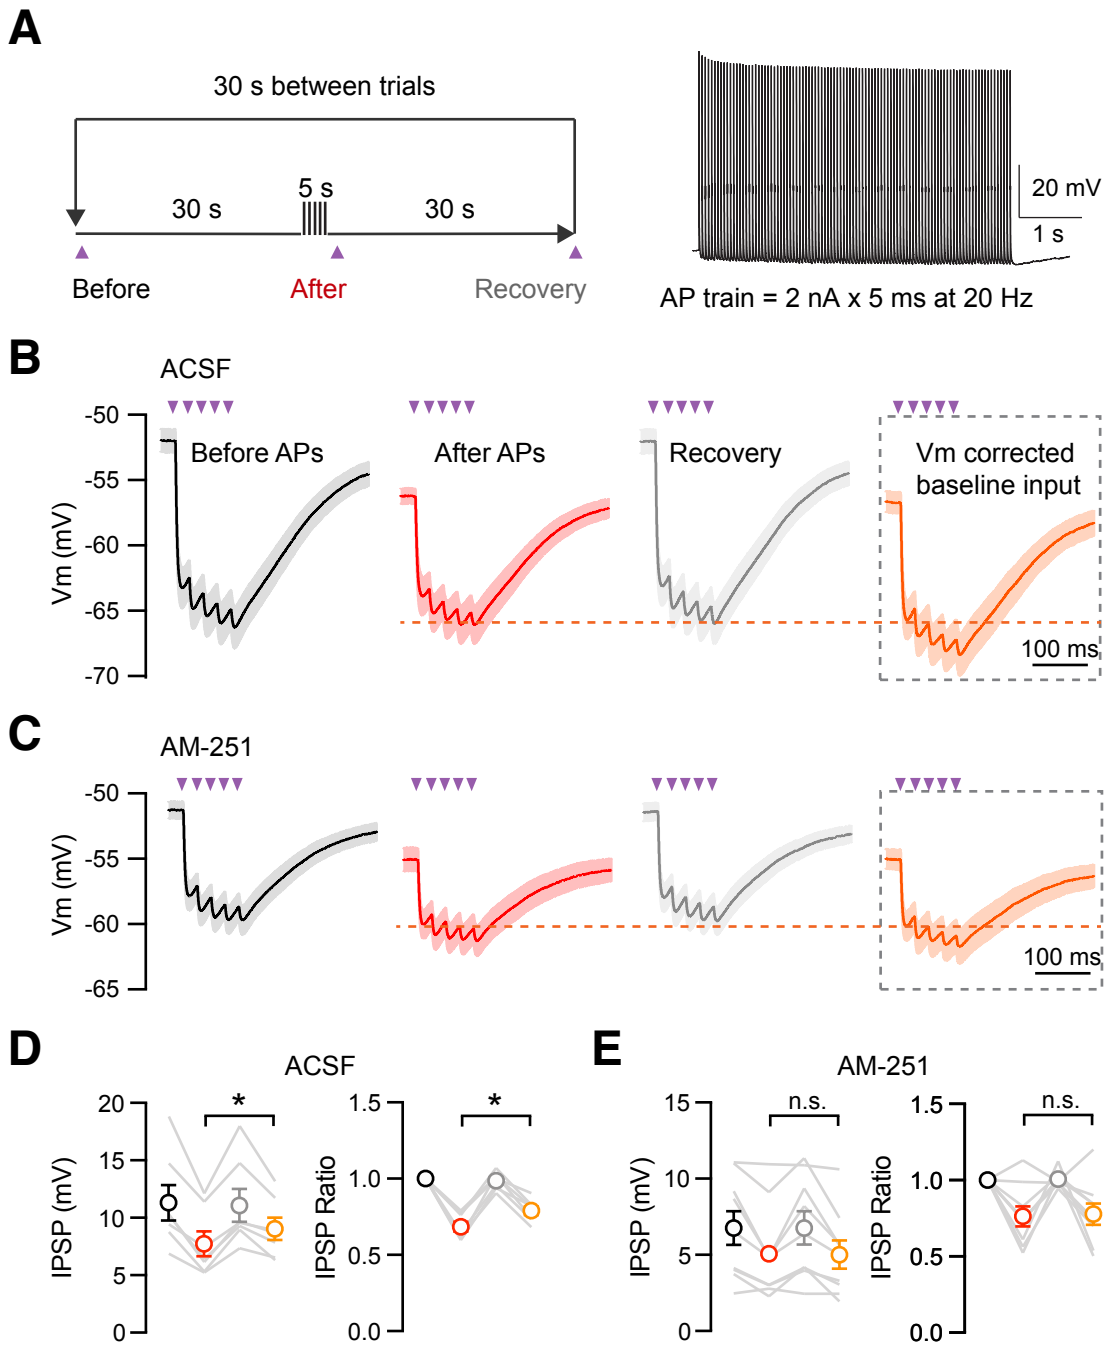

Supplement: supp [file elife-55267-supp-v1.zip]

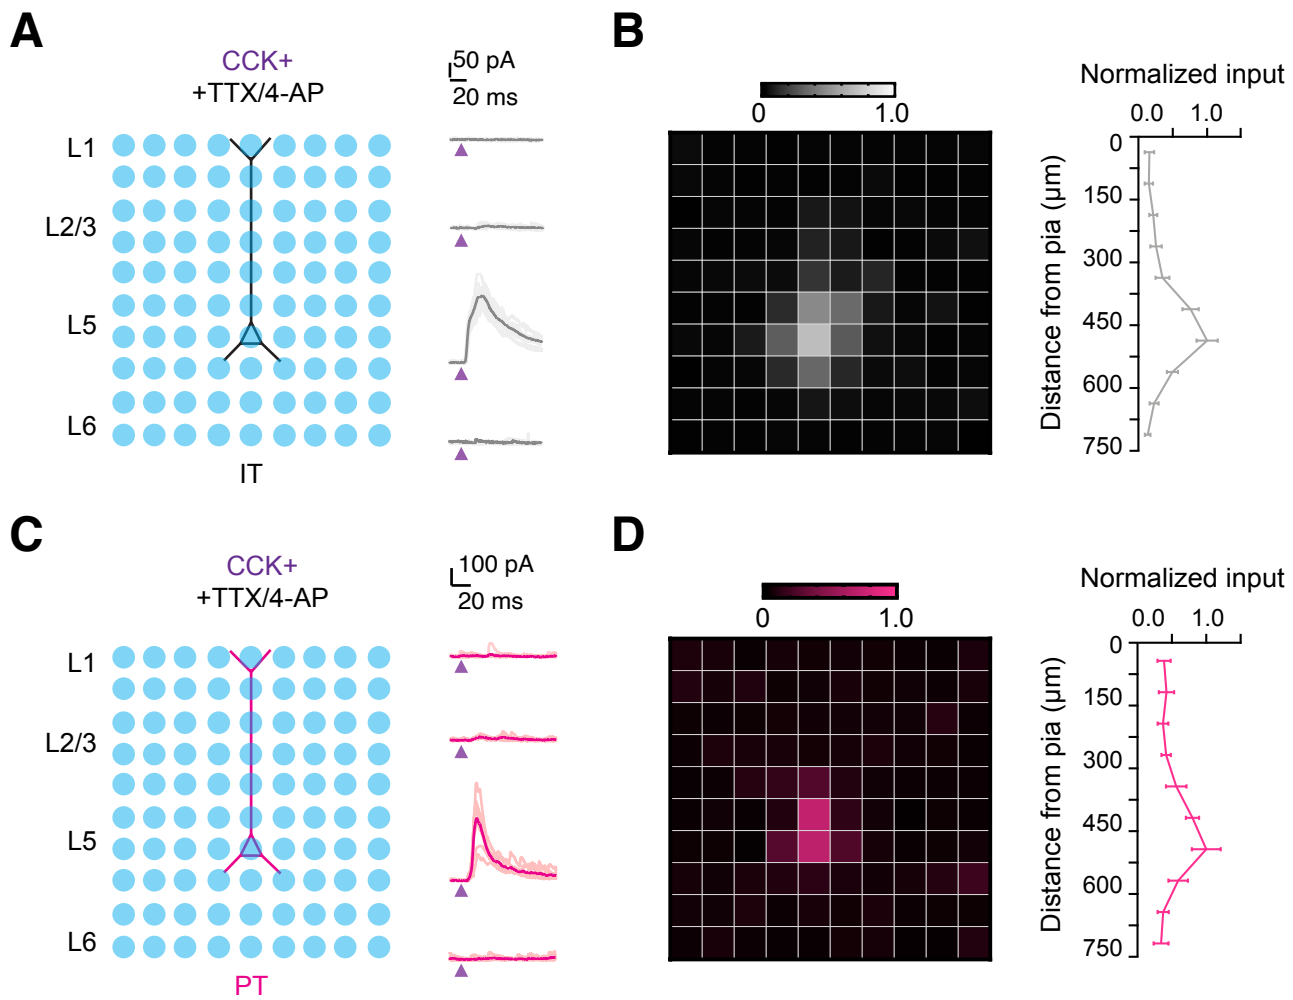

Supplement: supp [file elife-55267-supp-v1.zip]

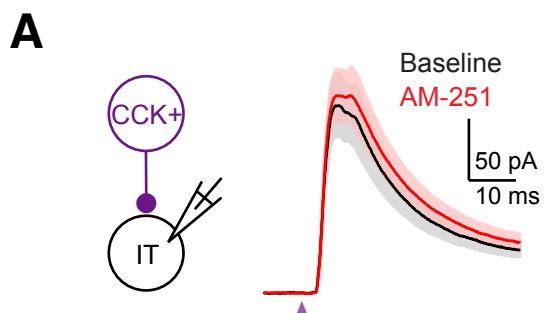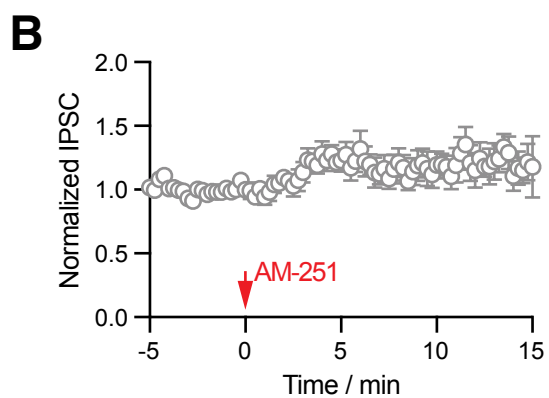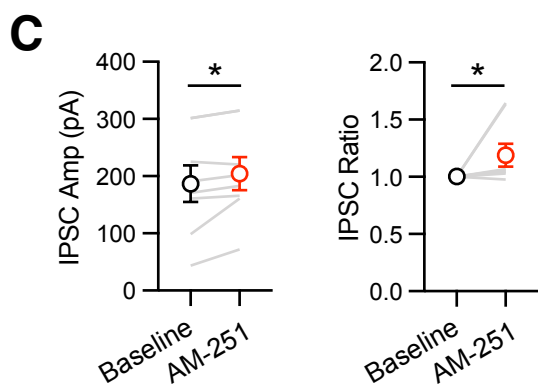

Supplement: supp [file elife-55267-supp-v1.zip]

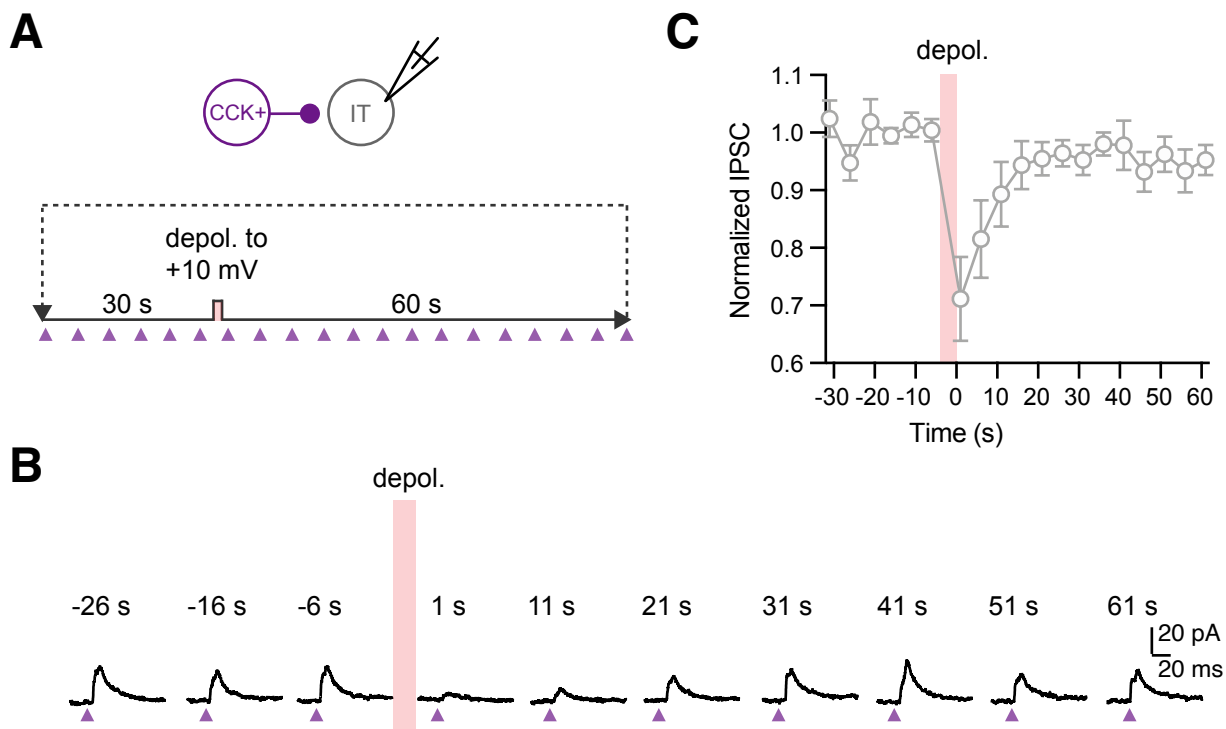

Supplement: supp [file elife-55267-supp-v1.zip › elife_poa_e55267_Figure_5_figure_supplement_1.pdf]

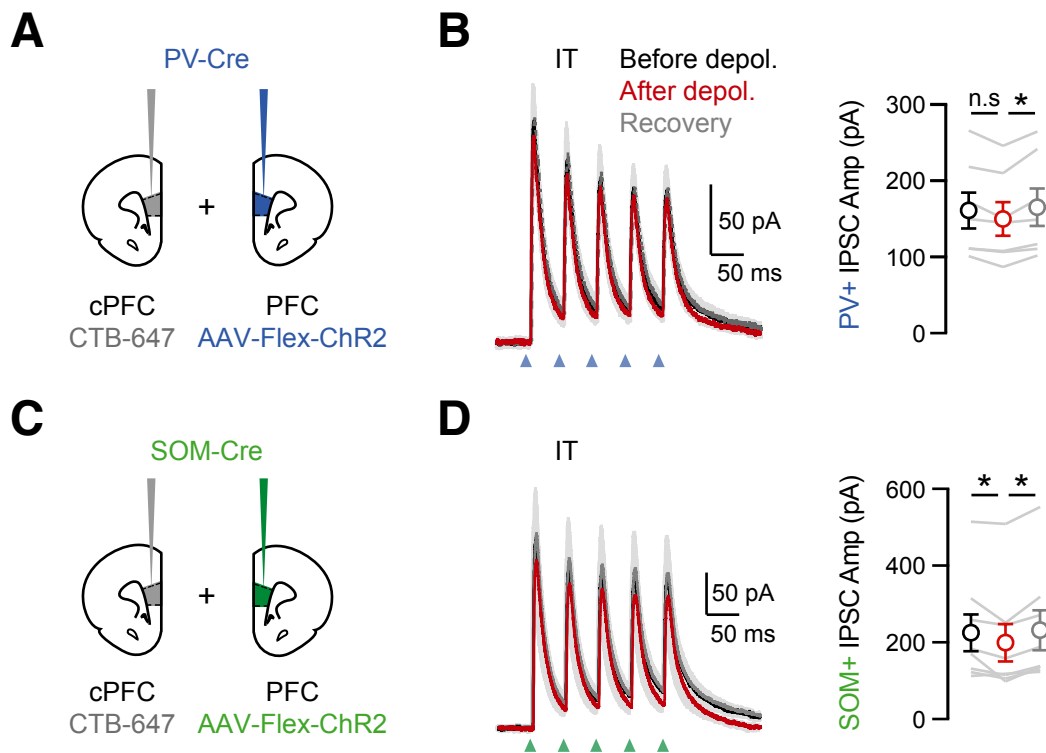

Supplement: supp [file elife-55267-supp-v1.zip › elife_poa_e55267_Figure_5_figure_supplement_2.pdf]
